# Supplementary material for: Quantification of cation–cation, anion–anion and cation–anion correlations in Li salt/glyme mixtures by combining very-low-frequency impedance spectroscopy with diffusion and electrophoretic NMR
Source: Royal Society of Chemistry journal article supplement (doi:10.1039/d0cp06147f), 2020-12-17
Supplement: d0cp06147f1.pdf [file d0cp06147f1.pdf]

## Supplementary Information

### Quantification of Cation-Cation, Anion-Anion and Cation-Anion Correlations in Li Salt / Glyme Mixtures by combining Very-low-frequency Impedance Spectroscopy with Diffusion and Electrophoretic NMR

Sandra Pfeifer<sup>a</sup>, Florian Ackermann<sup>b</sup>, Fabian Sälzer<sup>a</sup>, Monika Schönhoff<sup>\*b</sup> and Bernhard Roling<sup>\*a</sup>

<sup>a</sup>Department of Chemistry and Center of Materials Science (WZMW), University of Marburg, Hans-Meerwein-Straße 4, D-35032 Marburg, Germany. E-mail: roling@staff.uni-marburg.de

<sup>b</sup>Institute of Physical Chemistry, University of Muenster, Corrensstr. 30, D-48149 Münster, Germany. E-mail: schonhoff@uni-muenster.de

#### Experimental Data of Diffusion NMR and Electrophoretic NMR for the different LiFSI / G4 mixtures

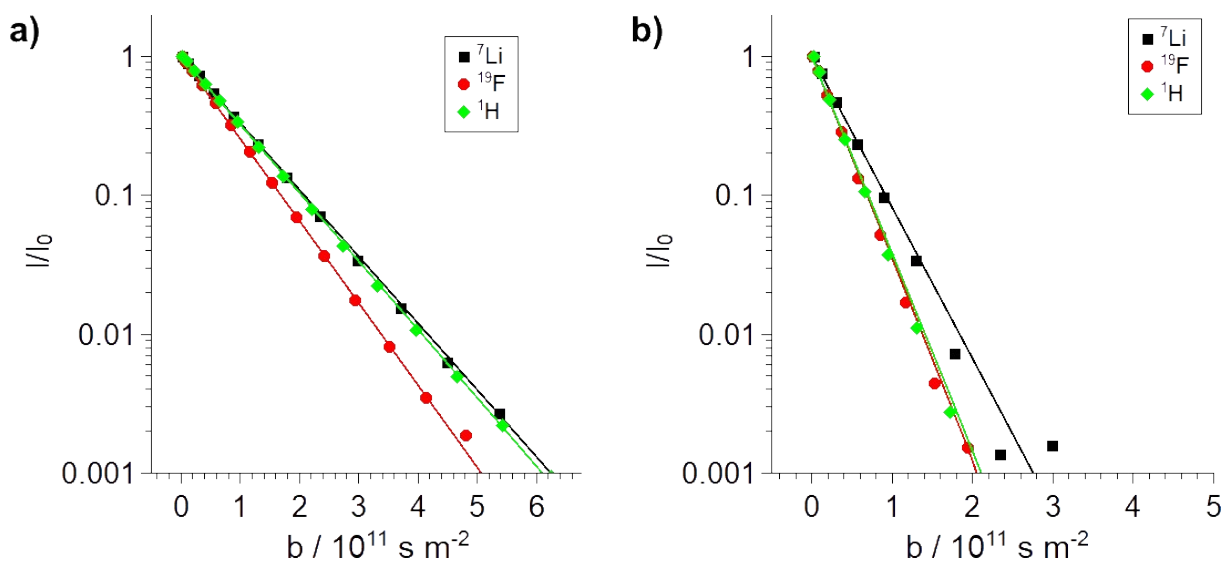

Figure S1: Signal attenuation  $I/I_0$  observed in  $^1\text{H}$ ,  $^7\text{Li}$  and  $^{19}\text{F}$  PFG-NMR experiments a) for the LiFSI / G4 1:1 mixture and b) for the LiFSI / G4 1:2 mixture.

The data of the  $^7\text{Li}$  and  $^1\text{H}$  signal exhibit the same slope for the LiFSI / G4 1:1 mixture (Fig. S1a), whereas the slopes differ for the LiFSI / G4 1:2 mixture (Fig. S1b). Thus, the self-diffusion coefficients of  $^7\text{Li}$  and  $^1\text{H}$  for the LiFSI / G4 1:1 are identical. For the LiFSI / G4 1:2 mixture the

G4 diffusion coefficient is a fast exchange average of G4 coordinated to Li, and free G4, thus it differs from the diffusion coefficient of the Li<sup>+</sup> ion.

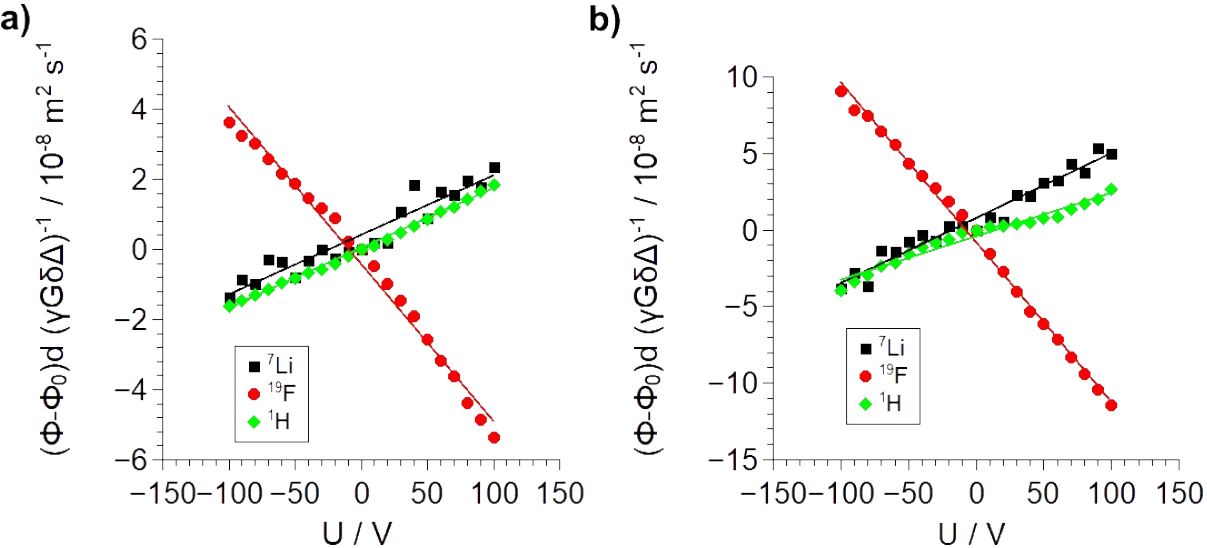

Figure S2: Voltage  $U$  dependent reduced phase shift values  $(\phi - \phi_0) d\gamma^{-1} G^{-1} \delta^{-1} \Delta^{-1}$  observed via  $^1\text{H}$ ,  $^7\text{Li}$  and  $^{19}\text{F}$  eNMR a) for the LiFSI / G4 1:1 mixture and b) for the LiFSI / G4 1:2 mixture.

The observed  $^1\text{H}$  phase shift values and their slope describe the G4 movement, exhibiting the same slope and mobility as  $^7\text{Li}$  for the LiFSI / G4 1:1 mixture (Fig. S2a). This is in agreement with the observation of identical diffusion coefficients. For the LiFSI / G4 1:2 mixture (Fig. S2b) a deviation for the slopes can be observed, which is again a consequence of the fast exchange average giving the G4 mobility.

**Thermodynamic factor for the LiFSI / G4 1:1 mixture and different LiFSI / G4 mixtures**

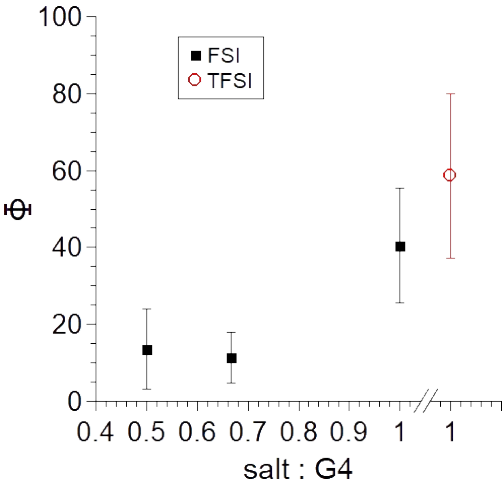

Figure S3: Thermodynamic factors for the different electrolyte mixtures.

### Derivation of Eqs. [35a-c]

We start with Eqs. [33a], [33b], [34a], and [34b]:

$$\frac{1}{1+k} \left[ \sum_{i=1}^{N/2} (\Delta x_i^+) \right] + \frac{k}{1+k} \left[ \sum_{i=1}^{N/2} (\Delta x_i^-) \right] = A \cdot x_0 \cdot \sqrt{N} \quad [33a]$$

$$\sum_{i=1}^{N/2} (\Delta x_i^+) - \sum_{i=1}^{N/2} (\Delta x_i^-) = B \cdot x_0 \cdot \sqrt{N} \quad [33b]$$

$$\Delta x_i^+ = x_0 \cdot (g_i + a_i^+ \cdot A + b_i^+ \cdot B) \quad [34a]$$

$$\Delta x_i^- = x_0 \cdot (g_i + a_i^- \cdot A + b_i^- \cdot B) \quad [34b]$$

First, Eqs. [34a] and [34b] are inserted into Eq. [33a] resulting in:

$$\begin{aligned} & \frac{1}{1+k} \sum_{i=1}^{N/2} [x_0 \cdot (g_i + a_i^+ \cdot A + b_i^+ \cdot B)] + \frac{k}{1+k} \sum_{i=1}^{N/2} [x_0 \cdot (g_i + a_i^- \cdot A + b_i^- \cdot B)] \\ & = A \cdot x_0 \cdot \sqrt{N} \end{aligned} \quad [S1]$$

Since  $g_i$  denotes a displacement distribution function with mean  $\bar{g}_i = 0$  (averaged over all ions), Eq. [S1] can be rewritten as:

$$\frac{1}{1+k} \left[ \sum_{i=1}^{N/2} (a_i^+ \cdot A) + \sum_{i=1}^{N/2} (b_i^+ \cdot B) \right] + \frac{k}{1+k} \left[ \sum_{i=1}^{N/2} (a_i^- \cdot A) + \sum_{i=1}^{N/2} (b_i^- \cdot B) \right] = A \cdot \sqrt{N} \quad [S2]$$

From Eq. [S2] it follows that:

$$\frac{1}{1+k} \left[ \sum_{i=1}^{N/2} (b_i^+) \right] + \frac{k}{1+k} \left[ \sum_{i=1}^{N/2} (b_i^-) \right] = 0 \quad [S3]$$

$$\frac{1}{1+k} \left[ \sum_{i=1}^{N/2} (a_i^+) \right] + \frac{k}{1+k} \left[ \sum_{i=1}^{N/2} (a_i^-) \right] = \sqrt{N} \quad [S4]$$

Next, we insert Eqs. [34a] and [34b] into Eq. [33b]:

$$\sum_{i=1}^{N/2} [x_0 \cdot (g_i + a_i^+ \cdot A + b_i^+ \cdot B)] - \sum_{i=1}^{N/2} [x_0 \cdot (g_i + a_i^- \cdot A + b_i^- \cdot B)] = B \cdot x_0 \cdot \sqrt{N} \quad [S5]$$

With  $\overline{g}_i = 0$ , Eq. [S5] can be rewritten as:

$$\sum_{i=1}^{N/2} (a_i^+ \cdot A) + \sum_{i=1}^{N/2} (b_i^+ \cdot B) - \sum_{i=1}^{N/2} (a_i^- \cdot A) - \sum_{i=1}^{N/2} (b_i^- \cdot B) = B \cdot \sqrt{N} \quad [\text{S6}]$$

From Eq. [S6], it follows that:

$$\sum_{i=1}^{N/2} (a_i^+) - \sum_{i=1}^{N/2} (a_i^-) = 0 \quad \Rightarrow \quad \sum_{i=1}^{N/2} (a_i^+) = \sum_{i=1}^{N/2} (a_i^-) \quad [\text{S7}]$$

$$\sum_{i=1}^{N/2} (b_i^+) - \sum_{i=1}^{N/2} (b_i^-) = \sqrt{N} \quad [\text{S8}]$$

Now, insertion of Eq. [S7] into Eq. [S4] leads to:

$$\frac{1}{1+k} \left[ \sum_{i=1}^{N/2} (a_i^+) \right] + \frac{k}{1+k} \left[ \sum_{i=1}^{N/2} (a_i^+) \right] = \sum_{i=1}^{N/2} (a_i^+) = \sqrt{N} \quad [\text{S9}]$$

The same is valid for  $\sum_{i=1}^{N/2} (a_i^-)$ , thus Eq. [35a] can be written as:

$$\sum_{i=1}^{N/2} (a_i^+) = \sum_{i=1}^{N/2} (a_i^-) = \sqrt{N} \quad [\text{35a}]$$

Next, we rewrite Eq. [S8] as:

$$\sum_{i=1}^{N/2} (b_i^-) = \sum_{i=1}^{N/2} (b_i^+) - \sqrt{N} \quad [\text{S10}]$$

and we insert Eq. [S10] into Eq. [S3]:

$$\frac{1}{1+k} \left[ \sum_{i=1}^{N/2} (b_i^+) \right] + \frac{k}{1+k} \left[ \sum_{i=1}^{N/2} (b_i^+) - \sqrt{N} \right] = 0 \quad [\text{S11}]$$

From Eq. [S11], we obtain Eq. [35b]:

$$\sum_{i=1}^{N/2} (b_i^+) = \frac{k}{1+k} \cdot \sqrt{N} \quad [\text{35b}]$$

Finally, Eq. [35b] is inserted into Eq. [S10] leading to Eq. [35c].

$$\sum_{i=1}^{N/2} (b_i^-) = \frac{k}{1+k} \cdot \sqrt{N} - \sqrt{N} = -\frac{1}{1+k} \cdot \sqrt{N} \quad [35c]$$

### Derivation of $\sigma_+^{self}$ – Eq. [36a]

We start with inserting Eq. [34a] into Eq. [S12]:

$$\Delta x_i^+ = x_0 \cdot (g_i + a_i^+ \cdot A + b_i^+ \cdot B) \quad [34a]$$

$$\sigma_+^{self} = \frac{e^2}{2Vk_B T \Delta t} \left\langle \sum_{i=1}^{N/2} (\Delta x_i^+)^2 \right\rangle = \frac{e^2}{2Vk_B T \Delta t} \cdot \left\langle \sum_{i=1}^{N/2} [x_0 \cdot (g_i + a_i^+ \cdot A + b_i^+ \cdot B)]^2 \right\rangle \quad [S12]$$

Here, the brackets  $\langle \dots \rangle$  denote the ensemble average. In the following, we assume that center-of-mass and dipole fluctuations are uncorrelated, implying that  $\langle AB \rangle = \langle A \rangle \cdot \langle B \rangle = 0$ . With  $\overline{g_i} = 0$ ,  $\langle A \rangle = 0$  and  $\langle B \rangle = 0$ , it follows that:

$$\sigma_+^{self} = \frac{e^2 \cdot (x_0)^2}{2Vk_B T \Delta t} \cdot \left\langle \sum_{i=1}^{N/2} (g_i)^2 + \sum_{i=1}^{N/2} (a_i^+ \cdot A)^2 + \sum_{i=1}^{N/2} (b_i^+ \cdot B)^2 \right\rangle \quad [S13]$$

With  $\overline{(g_i)^2} = 1$  and thus the sum  $\sum_{i=1}^{N/2} (g_i)^2$  being identical to  $N/2$ , Eq. [S13] can be written as:

$$\sigma_+^{self} = \frac{e^2 \cdot (x_0)^2}{2Vk_B T \Delta t} \cdot \left[ \frac{N}{2} + \sum_{i=1}^{N/2} (a_i^+)^2 \cdot \langle A^2 \rangle + \sum_{i=1}^{N/2} (b_i^+)^2 \cdot \langle B^2 \rangle \right] \quad [S14]$$

With the number density  $N_v = \frac{N/2}{V}$  and the prefactor  $\sigma_0 = \frac{N_v \cdot e^2 \cdot (x_0)^2}{2 \cdot k_B \cdot T \cdot \Delta t}$ , we finally obtain Eq. [36a]:

$$\sigma_+^{self} = \sigma_0 \cdot \left( 1 + \frac{\sum_{i=1}^{N/2} (a_i^+)^2}{\frac{N}{2}} \cdot \langle A^2 \rangle + \frac{\sum_{i=1}^{N/2} (b_i^+)^2}{\frac{N}{2}} \langle B^2 \rangle \right) \quad [36a]$$

### Derivation of $\sigma_{++}$ – Eq. [36b]

We start with inserting Eq. [34a] into Eq. [31a], giving [S15].

$$\Delta x_i^+ = x_0 \cdot (g_i + a_i^+ \cdot A + b_i^+ \cdot B) \quad [34a]$$

$$\sigma_{++} = \frac{e^2}{2Vk_B T \Delta t} \left\langle \left( \sum_{i=1}^{N/2} \Delta x_i^+ \right)^2 \right\rangle \quad [31a]$$

$$\sigma_{++} = \frac{e^2}{2Vk_B T \Delta t} \cdot \left\langle \left( \sum_{i=1}^{N/2} [x_0 \cdot (g_i + a_i^+ \cdot A + b_i^+ \cdot B)] \right)^2 \right\rangle \quad [S15]$$

Since  $\overline{g_i} = 0$ , the sum  $\left[ \sum_{i=1}^{N/2} g_i \right]^2$  cancels, and Eq. [S16] is obtained.

$$\sigma_{++} = \frac{e^2 \cdot (x_0)^2}{2Vk_B T \Delta t} \cdot \left\langle \left( \sum_{i=1}^{N/2} (a_i^+ \cdot A) + \sum_{i=1}^{N/2} (b_i^+ \cdot B) \right)^2 \right\rangle \quad [S16]$$

With Eqs. [35a] and [35b], this results in:

$$\sigma_{++} = \frac{e^2 \cdot (x_0)^2}{2Vk_B T \Delta t} \cdot \left\langle \left( \sqrt{N} \cdot A + \frac{k}{1+k} \cdot \sqrt{N} \cdot B \right)^2 \right\rangle \quad [S17]$$

With  $\langle AB \rangle = \langle A \rangle \cdot \langle B \rangle = 0$ , this leads to Eq. [36b]:

$$\sigma_{++} = \frac{e^2 \cdot (x_0)^2}{2Vk_B T \Delta t} \cdot \left( N \langle A^2 \rangle + N \frac{k^2}{(1+k)^2} \langle B^2 \rangle \right) = \sigma_0 \cdot \left( 2 \langle A^2 \rangle + 2 \frac{k^2}{(1+k)^2} \langle B^2 \rangle \right) \quad [36b]$$

**Derivation of  $\sigma_{++}^{distinct}$  – Eq. [36c]**

We start with

$$\sigma_{++}^{distinct} = \sigma_{++} - \sigma_{+}^{self} \quad [S18]$$

derived from Eq. [20] and insert Eqs. [36a] and [36b]:

$$\sigma_{++}^{distinct} = \sigma_0 \cdot \left[ \begin{array}{c} 2\langle A^2 \rangle + 2\frac{k^2}{(1+k)^2}\langle B^2 \rangle - \\ \sum_{i=1}^{N/2} (a_i^+)^2 \quad \sum_{i=1}^{N/2} (b_i^+)^2 \\ 1 + \frac{N}{2} \cdot \langle A^2 \rangle + \frac{N}{2} \langle B^2 \rangle \end{array} \right] \quad [S19]$$

After resorting the terms, Eq. [36c] is obtained.

$$\sigma_{++}^{distinct} = \sigma_0 \cdot \left[ \begin{array}{c} -1 + \left( 2 - \frac{\sum_{i=1}^{N/2} (a_i^+)^2}{\frac{N}{2}} \right) \langle A^2 \rangle + \\ \left( 2\frac{k^2}{(1+k)^2} - \frac{\sum_{i=1}^{N/2} (b_i^+)^2}{\frac{N}{2}} \right) \langle B^2 \rangle \end{array} \right] \quad [36c]$$

**Derivation of  $\sigma_{-}^{self}$  – Eq. [36d]**

Analogous to the derivation of  $\sigma_{+}^{self}$ , insertion of

$$\Delta x_i^- = x_0 \cdot (g_i + a_i^- \cdot A + b_i^- \cdot B) \quad [34b]$$

Into

$$\sigma_{-}^{self} = \frac{e^2}{2Vk_B T \Delta t} \left\langle \sum_{i=1}^{N/2} (\Delta x_i^-)^2 \right\rangle \quad [S20]$$

gives Eq. [36d]:

$$\sigma_{-}^{self} = \sigma_0 \cdot \left( 1 + \frac{\sum_{i=1}^{N/2} (a_i^-)^2}{\frac{N}{2}} \cdot \langle A^2 \rangle + \frac{\sum_{i=1}^{N/2} (b_i^-)^2}{\frac{N}{2}} \langle B^2 \rangle \right) \quad [36d]$$

#### Derivation of $\sigma_{--}$ – Eq. [36e]

Insertion of Eqs. [34b], [35a] and [35c] into

$$\sigma_{--} = \frac{e^2}{2Vk_B T \Delta t} \left\langle \left( \sum_{i=1}^{N/2} \Delta x_i^- \right)^2 \right\rangle \quad [31b]$$

results in Eq. [36e]:

$$\sigma_{--} = \sigma_0 \cdot \left( 2 \langle A^2 \rangle + 2 \frac{1}{(1+k)^2} \langle B^2 \rangle \right) \quad [36e]$$

#### Derivation of $\sigma_{--}^{distinct}$ – Eq. [36f]

Insertion of Eqs. [36d] and [36e] into

$$\sigma_{--}^{distinct} = \sigma_{--} - \sigma_{-}^{self} \quad [S21]$$

derived from Eq. [21] and resorting the terms results in Eq. [36f]:



$$\sigma_{--}^{distinct} = \sigma_0 \cdot \left[ \begin{array}{c} -1 + \left( 2 - \frac{\sum_{i=1}^{N/2} (a_i^-)^2}{\frac{N}{2}} \right) \langle A^2 \rangle + \\ \left( 2 \frac{1}{(1+k)^2} - \frac{\sum_{i=1}^{N/2} (b_i^-)^2}{\frac{N}{2}} \right) \langle B^2 \rangle \end{array} \right] \quad [36f]$$

### Derivation of $\sigma_{+-}$ – Eq. [36g]

Insertion of Eqs. [34a] and [34b] into Eq. [31c]

$$\sigma_{+-} = \frac{e^2}{2Vk_B T \Delta t} \left\langle \left( \sum_{i=1}^{N/2} \Delta x_i^+ \right) \cdot \left( \sum_{i=1}^{N/2} \Delta x_i^- \right) \right\rangle \quad [31c]$$

gives:

$$\sigma_{+-} = \frac{e^2}{2Vk_B T \Delta t} \cdot \left\langle \left( \sum_{i=1}^{N/2} [x_0 \cdot (g_i + a_i^+ \cdot A + b_i^+ \cdot B)] \right) \cdot \left( \sum_{i=1}^{N/2} [x_0 \cdot (g_i + a_i^- \cdot A + b_i^- \cdot B)] \right) \right\rangle \quad [S22]$$

With  $\overline{g_i} = 0$ , this transforms into:

$$\sigma_{+-} = \frac{e^2 \cdot (x_0)^2}{2Vk_B T \Delta t} \cdot \left\langle \left( \sum_{i=1}^{N/2} (a_i^+ \cdot A + b_i^+ \cdot B) \right) \cdot \left( \sum_{i=1}^{N/2} (a_i^- \cdot A + b_i^- \cdot B) \right) \right\rangle \quad [S23]$$

With  $\langle AB \rangle = \langle A \rangle \cdot \langle B \rangle = 0$ , this simplifies to:

$$\sigma_{+-} = \frac{e^2 \cdot (x_0)^2}{2Vk_B T \Delta t} \cdot \left[ \left( \sum_{i=1}^{N/2} (a_i^+) \cdot \sum_{i=1}^{N/2} (a_i^-) \right) \langle A^2 \rangle + \left( \sum_{i=1}^{N/2} (b_i^+) \cdot \sum_{i=1}^{N/2} (b_i^-) \right) \langle B^2 \rangle \right] \quad [S24]$$

Insertion of Eqs. [35a]-[35c] results in [36g]:

$$\sigma_{+-} = \frac{e^2 \cdot (x_0)^2}{2V k_B T \Delta t} \cdot \left( N \langle A^2 \rangle - N \frac{k}{(1+k)^2} \langle B^2 \rangle \right) = \sigma_0 \cdot \left( 2 \langle A^2 \rangle - 2 \frac{k}{(1+k)^2} \langle B^2 \rangle \right) \quad [36g]$$

### Derivation of $\sigma_{ion}$ – Eq. [36h]

Insertion of Eqs. [36b], [36e], and [36g] into Eq. [12]

$$\sigma_{ion} = \sigma_{++} + \sigma_{--} - 2\sigma_{+-} \quad [12]$$

results in:

$$\begin{aligned} \sigma_{ion} = \sigma_0 \cdot \left( 2 \langle A^2 \rangle + 2 \frac{k^2}{(1+k)^2} \langle B^2 \rangle \right) + \sigma_0 \cdot \left( 2 \langle A^2 \rangle + 2 \frac{1}{(1+k)^2} \langle B^2 \rangle \right) - \\ 2\sigma_0 \cdot \left( 2 \langle A^2 \rangle - 2 \frac{k}{(1+k)^2} \langle B^2 \rangle \right) \end{aligned} \quad [S25]$$

This simplifies to Eq. [36h]:

$$\sigma_{ion} = \sigma_0 \cdot 2 \cdot \langle B^2 \rangle \quad [36h]$$

### Derivation of $t_+^\mu \cdot \sigma_{ion}$ – Eq. [37a]

We start with

$$t_+^\mu \cdot \sigma_{ion} = \sigma_{++} - \sigma_{+-} \quad [S26]$$

derived from Eq. [14] and insert Eqs. [36b] and [36g]:

$$\begin{aligned} t_+^\mu \cdot \sigma_{ion} = \sigma_0 \cdot \left( 2 \langle A^2 \rangle + 2 \frac{k^2}{(1+k)^2} \langle B^2 \rangle \right) - \sigma_0 \cdot \left( 2 \langle A^2 \rangle - 2 \frac{k}{(1+k)^2} \langle B^2 \rangle \right) \\ = \sigma_0 \cdot 2 \cdot \frac{k}{1+k} \cdot \langle B^2 \rangle \end{aligned} \quad [37a]$$

### Derivation of $(1 - t_+^\mu) \cdot \sigma_{ion}$ – Eq. [37b]

We start with

$$(1 - t_+^\mu) \cdot \sigma_{ion} = \sigma_{--} - \sigma_{+-} \quad [\text{S27}]$$

and insert Eqs. [36e] and [36g]:

$$\begin{aligned} & (1 - t_+^\mu) \cdot \sigma_{ion} = \\ & \sigma_0 \cdot \left( 2\langle A^2 \rangle + 2\frac{1}{(1+k)^2}\langle B^2 \rangle \right) - \sigma_0 \cdot \left( 2\langle A^2 \rangle - 2\frac{k}{(1+k)^2}\langle B^2 \rangle \right) \\ & = \sigma_0 \cdot 2 \cdot \frac{1}{1+k} \cdot \langle B^2 \rangle \end{aligned} \quad [\text{S7b}]$$

**Derivation of  $t_+^{abc} \cdot \sigma_{ion}$  – Eq. [39]**

We start with

$$t_+^{abc} \cdot \sigma_{ion} = \sigma_{++} - \frac{(\sigma_{+-})^2}{\sigma_{--}} \quad [\text{S28}]$$

derived from Eq. [13] and insert Eqs. [36b], [36e], and [36g]:

$$t_+^{abc} \cdot \sigma_{ion} = \sigma_0 \cdot 2 \cdot \left[ \langle A^2 \rangle + \frac{k^2}{(1+k)^2}\langle B^2 \rangle - \frac{\left( \langle A^2 \rangle - \frac{k}{(1+k)^2}\langle B^2 \rangle \right)^2}{\langle A^2 \rangle + \frac{1}{(1+k)^2}\langle B^2 \rangle} \right] \quad [\text{S8}]$$

In the case of  $\langle A^2 \rangle \ll \frac{k}{(1+k)^2}\langle B^2 \rangle$ , the term  $\langle A^2 \rangle^2$  from the expansion of  $\left( \langle A^2 \rangle - \frac{k}{(1+k)^2}\langle B^2 \rangle \right)^2$  can be neglected, resulting in:

$$t_+^{abc} \cdot \sigma_{ion} \approx \sigma_0 \cdot 2 \cdot \left[ \langle A^2 \rangle + \frac{k^2}{(1+k)^2}\langle B^2 \rangle + \frac{\frac{2k}{(1+k)^2}\langle A^2 \rangle\langle B^2 \rangle - \frac{k^2}{(1+k)^4}\langle B^2 \rangle^2}{\langle A^2 \rangle + \frac{1}{(1+k)^2}\langle B^2 \rangle} \right] \quad [\text{S29}]$$

In the right-hand term, the terms  $-\frac{k^2}{(1+k)^4}\langle B^2 \rangle^2$  and  $\frac{1}{(1+k)^2}\langle B^2 \rangle$  are factored out in the numerator and in the denominator, respectively:

$$t_+^{abc} \cdot \sigma_{ion} \approx \sigma_0 \cdot 2 \cdot \left[ \frac{\langle A^2 \rangle + \frac{k^2}{(1+k)^2} \langle B^2 \rangle + \left(1 - \frac{2(1+k)^2}{k} \cdot \frac{\langle A^2 \rangle}{\langle B^2 \rangle}\right) \left(-\frac{k^2}{(1+k)^4} \langle B^2 \rangle^2\right)}{\left(1 + (1+k)^2 \cdot \frac{\langle A^2 \rangle}{\langle B^2 \rangle}\right) \left(\frac{1}{(1+k)^2} \langle B^2 \rangle\right)} \right] \quad [\text{S30}]$$

$$= \sigma_0 \cdot 2 \cdot \left[ \langle A^2 \rangle + \frac{k^2}{(1+k)^2} \langle B^2 \rangle + \frac{\left(1 - \frac{2(1+k)^2}{k} \cdot \frac{\langle A^2 \rangle}{\langle B^2 \rangle}\right)}{\left(1 + (1+k)^2 \cdot \frac{\langle A^2 \rangle}{\langle B^2 \rangle}\right)} \cdot \left(-\frac{k^2}{(1+k)^2} \langle B^2 \rangle\right) \right]$$

Since  $\langle A^2 \rangle \ll \langle B^2 \rangle$ , we apply the approximation  $\frac{1-x_1}{1+x_2} \approx 1-x_1-x_2$ :

$$t_+^{abc} \cdot \sigma_{ion} \approx \sigma_0 \cdot 2 \cdot \left[ \langle A^2 \rangle + \frac{k^2}{(1+k)^2} \langle B^2 \rangle + \left(1 - \frac{2(1+k)^2}{k} \cdot \frac{\langle A^2 \rangle}{\langle B^2 \rangle} - (1+k)^2 \cdot \frac{\langle A^2 \rangle}{\langle B^2 \rangle}\right) \cdot \left(-\frac{k^2}{(1+k)^2} \langle B^2 \rangle\right) \right] \quad [\text{S31}]$$

$$= \sigma_0 \cdot 2 \cdot \left[ \frac{\langle A^2 \rangle + \frac{k^2}{(1+k)^2} \langle B^2 \rangle - \frac{k^2}{(1+k)^2} \langle B^2 \rangle + \frac{2k^2(1+k)^2}{k(1+k)^2} \cdot \frac{\langle A^2 \rangle \langle B^2 \rangle}{\langle B^2 \rangle} + \frac{k^2(1+k)^2}{(1+k)^2} \cdot \frac{\langle A^2 \rangle \langle B^2 \rangle}{\langle B^2 \rangle}}{\right]$$

$$= \sigma_0 \cdot 2 \cdot [\langle A^2 \rangle + 2k\langle A^2 \rangle + k^2\langle A^2 \rangle]$$

Thus, we finally obtain Eq. [39]:

$$t_+^{abc} \cdot \sigma_{ion} \approx \sigma_0 \cdot 2 \cdot (1+k)^2 \cdot \langle A^2 \rangle \quad [\text{39}]$$

Derivation of  $\frac{\sigma_{++}^{distinct}}{\sigma_+^{self}}$  – Eq. [40a]

We divide Eq. [36c] by Eq. [36a]:

$$\frac{\sigma_{++}^{distinct}}{\sigma_{+}^{self}} = \frac{\sigma_0 \cdot \left[ -1 + \left( 2 - \frac{\sum_{i=1}^{N/2} (a_i^+)^2}{\frac{N}{2}} \right) \langle A^2 \rangle + \left( 2 \frac{k^2}{(1+k)^2} - \frac{\sum_{i=1}^{N/2} (b_i^+)^2}{\frac{N}{2}} \right) \langle B^2 \rangle \right]}{\sigma_0 \cdot \left( 1 + \frac{\sum_{i=1}^{N/2} (a_i^+)^2}{\frac{N}{2}} \cdot \langle A^2 \rangle + \frac{\sum_{i=1}^{N/2} (b_i^+)^2}{\frac{N}{2}} \langle B^2 \rangle \right)} \quad [\text{S32}]$$

$$= \frac{-1 + 2\langle A^2 \rangle - \frac{\sum_{i=1}^{N/2} (a_i^+)^2}{\frac{N}{2}} \langle A^2 \rangle + 2 \frac{k^2}{(1+k)^2} \langle B^2 \rangle - \frac{\sum_{i=1}^{N/2} (b_i^+)^2}{\frac{N}{2}} \langle B^2 \rangle}{1 + \frac{\sum_{i=1}^{N/2} (a_i^+)^2}{\frac{N}{2}} \cdot \langle A^2 \rangle + \frac{\sum_{i=1}^{N/2} (b_i^+)^2}{\frac{N}{2}} \langle B^2 \rangle}$$

Now we assume that the fluctuations are small so that  $\frac{\sum_{i=1}^{N/2} (a_i^+)^2}{N/2} \cdot \langle A^2 \rangle \ll 1$  and

$\frac{\sum_{i=1}^{N/2} (b_i^+)^2}{N/2} \langle B^2 \rangle \ll 1$ . In this case, we can apply the approximation  $\frac{1}{1+x} \approx 1-x$ , resulting in Eq. [40a]:

$$\frac{\sigma_{++}^{distinct}}{\sigma_{+}^{self}} \approx -1 + 2\langle A^2 \rangle + 2 \frac{k^2}{(1+k)^2} \langle B^2 \rangle \quad [\text{40a}]$$

Derivation of  $\frac{\sigma_{--}^{distinct}}{\sigma_{--}^{self}}$  – Eq. [40b]

We divide Eq. [36f] by Eq. [36d]:

$$\begin{aligned}
 & \frac{\sigma_{--}^{distinct}}{\sigma_{--}^{self}} = \\
 & \frac{\sigma_0 \cdot \left[ -1 + \left( 2 - \frac{\sum_{i=1}^{N/2} (a_i^-)^2}{\frac{N}{2}} \right) \langle A^2 \rangle + \left( 2 \frac{1}{(1+k)^2} - \frac{\sum_{i=1}^{N/2} (b_i^-)^2}{\frac{N}{2}} \right) \langle B^2 \rangle \right]}{\sigma_0 \cdot \left( 1 + \frac{\sum_{i=1}^{N/2} (a_i^-)^2}{\frac{N}{2}} \cdot \langle A^2 \rangle + \frac{\sum_{i=1}^{N/2} (b_i^-)^2}{\frac{N}{2}} \langle B^2 \rangle \right)} \quad \text{[S33]} \\
 & = \frac{-1 + 2 \langle A^2 \rangle - \frac{\sum_{i=1}^{N/2} (a_i^-)^2}{\frac{N}{2}} \langle A^2 \rangle + 2 \frac{1}{(1+k)^2} \langle B^2 \rangle - \frac{\sum_{i=1}^{N/2} (b_i^-)^2}{\frac{N}{2}} \langle B^2 \rangle}{1 + \frac{\sum_{i=1}^{N/2} (a_i^-)^2}{\frac{N}{2}} \cdot \langle A^2 \rangle + \frac{\sum_{i=1}^{N/2} (b_i^-)^2}{\frac{N}{2}} \langle B^2 \rangle}
 \end{aligned}$$

Again we assume that the fluctuations are small so that  $\frac{\sum_{i=1}^{N/2} (a_i^-)^2}{N/2} \cdot \langle A^2 \rangle \ll 1$  and

$\frac{\sum_{i=1}^{N/2} (b_i^-)^2}{N/2} \langle B^2 \rangle \ll 1$ . In this case, the approximation  $\frac{1}{1+x} \approx 1-x$  results in Eq. [40b]:

$$\frac{\sigma_{-}^{distinct}}{\sigma_{-}^{self}} \approx -1 + 2\langle A^2 \rangle + 2\frac{1}{(1+k)^2} \langle B^2 \rangle \quad [40b]$$
